# Supplementary material
Source: ML conference proceedings conference paper supplement (https://www.ecva.net/papers/eccv_2020/papers_ECCV/html/123750290_ECCV_2020_paper.php)
Supplement: Supplementary file 1 [file 123750290-supp.pdf]

# Manifold Projection for Adversarial Defense on Face Recognition

Jianli Zhou<sup>1,2</sup>, Chao Liang<sup>1,2,\*</sup>, and Jun Chen<sup>1,2</sup>

<sup>1</sup> National Engineering Research Center for Multimedia Software, School of Computer Science, Wuhan University, China

<sup>2</sup> Key Laboratory of Multimedia and Network Communication Engineering, Hubei Province

## A Ablation study

To demonstrate the effectiveness of replacing explicit reconstruction loss with adversarial loss, we train two partial variants of A-VAE for comparison. The first variant adds Euclidean distance loss  $\mathcal{L}_{rec}$  while keeping  $\mathcal{L}_{GAN}$ . The second variant adds  $\mathcal{L}_{rec}$  and removes  $\mathcal{L}_{GAN}$ . In particular, we find that it is difficult for the model to synthesize high-resolution images without  $\mathcal{L}_{GAN}$ , so we expand the input size to  $128 \times 128$ . Figure 1 illustrates the synthesis results of these variants. Explicit reconstruction loss makes the model to restore noise. Table 1 shows the verification accuracies.

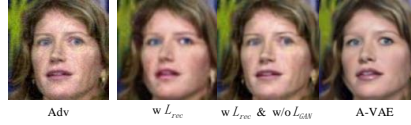

**Fig. 1.** The results produced by variations of A-VAE.

**Table 1.** Verification accuracies of variants. (Setting: FGSM, gray-box, LFW, VGG-Face2).

| LFW (Same identity pairs/Different identities pairs/Average) |                            |                          |
|--------------------------------------------------------------|----------------------------|--------------------------|
| Defense                                                      | clean                      | FGSM<br>$\epsilon = 8$   |
| No Defense                                                   | 0.992/0.992/0.992          | 0.190/0.300/0.245        |
| w $\mathcal{L}_{rec}$                                        | 0.932/0.998/0.964          | 0.603/0.850/0.727        |
| w $\mathcal{L}_{rec}$ + w/o $\mathcal{L}_{GAN}$              | <b>0.993/0.997/0.995</b>   | 0.377/0.387/0.382        |
| A-VAE                                                        | 0.927/ <b>1.000</b> /0.963 | <b>0.637/0.863/0.753</b> |

\* Corresponding author

## B Stability for different resolutions

As shown in Table 2 and Table 3, we evaluate the effectiveness of our method on LFW, at different resolutions. We notice that the performance of our method does not differ much at different resolutions, while others drop severely. Thanks to the mechanism of A-VAE, when the resolution of input is not less than  $32 \times 32$ , the fidelity of the generated images will not be damaged heavily. However, other methods produce low-resolution images, making perturbations more likely to eliminate useful information. This experiment shows the effectiveness of A-VAE on different quality datasets.

**Table 2.** Verification accuracies of different defense methods at resolution 64.

| LFW (Same identity pairs/Different identities pairs/Average) |                                     |                                     |                               |                                     |                                     |
|--------------------------------------------------------------|-------------------------------------|-------------------------------------|-------------------------------|-------------------------------------|-------------------------------------|
| Defense                                                      | clean                               | FGSM<br>$\epsilon = 4$              | FGSM<br>$\epsilon = 8$        | PGD<br>$\epsilon = 8$               | C&W                                 |
| No Defense                                                   | 0.990/0.993<br>/0.992               | 0.447/0.410<br>/0.428               | 0.167/0.297<br>/0.232         | 0.000/0.013<br>/0.006               | 0.000/0.027<br>/0.013               |
| adversarial FGSM [1]                                         | <b>0.971/0.997</b><br><b>/0.984</b> | 0.473/0.791<br>/0.632               | 0.140/0.787<br>/0.463         | 0.017/0.203<br>/0.110               | 0.000/0.474<br>/0.238               |
| feature denoising [5]                                        | 0.947/0.963<br>/0.955               | 0.590/0.740<br>/0.665               | 0.197/0.767<br>/0.482         | 0.060/0.253<br>/0.157               | 0.037/0.603<br>/0.320               |
| TVM [2]                                                      | 0.951/0.990<br>/0.975               | 0.677/0.987<br>/0.831               | 0.267/0.723<br>/0.495         | 0.337/0.747<br>/0.542               | 0.050/0.567<br>/0.308               |
| Quilting [2]                                                 | 0.870/ <b>1.000</b><br>/0.935       | <b>0.677/0.987</b><br><b>/0.832</b> | 0.393/ <b>0.943</b><br>/0.668 | <b>0.511/0.973</b><br><b>/0.742</b> | 0.197/ <b>0.957</b><br>/0.577       |
| Pixel Deflection [4]                                         | 0.967/0.999<br>/0.983               | 0.503/0.827<br>/0.665               | 0.153/0.810<br>/0.482         | 0.017/0.283<br>/0.150               | 0.000/0.563<br>/0.282               |
| ComDefend [3]                                                | 0.967/0.999<br>/0.983               | 0.533/0.863<br>/0.698               | 0.191/0.821<br>/0.506         | 0.077/0.483<br>/0.280               | 0.013/0.590<br>/0.302               |
| A-VAE                                                        | 0.917/0.997<br>/0.957               | 0.633/0.977<br>/0.805               | <b>0.467/0.940</b><br>/0.703  | 0.487/ <b>0.983</b><br>/0.735       | <b>0.327/0.947</b><br><b>/0.637</b> |

**Table 3.** Verification accuracies of different defense methods at resolution 32.

| LFW (Same identity pairs/Different identities pairs/Average) |                                     |                                     |                                     |                                     |                                     |
|--------------------------------------------------------------|-------------------------------------|-------------------------------------|-------------------------------------|-------------------------------------|-------------------------------------|
| Defense                                                      | clean                               | FGSM<br>$\epsilon = 4$              | FGSM<br>$\epsilon = 8$              | PGD<br>$\epsilon = 8$               | C&W                                 |
| No Defense                                                   | 0.967/0.997<br>/0.982               | 0.283/0.590<br>/0.436               | 0.097/0.557<br>/0.327               | 0.000/0.030<br>/0.015               | 0.000/0.023<br>/0.015               |
| adversarial FGSM [1]                                         | <b>0.913/0.997</b><br><b>/0.955</b> | 0.247/0.887<br>/0.567               | 0.067/0.937<br>/0.502               | 0.010/0.483<br>/0.247               | 0.023/0.773<br>/0.398               |
| feature denoising [5]                                        | 0.873/0.983<br>/0.928               | 0.357/0.863<br>/0.610               | 0.107/0.930<br>/0.518               | 0.067/0.510<br>/0.288               | 0.081/0.803<br>/0.442               |
| TVM [2]                                                      | 0.837/ <b>1.000</b><br>/0.918       | 0.390/0.933<br>/0.662               | 0.123/0.863<br>/0.493               | 0.243/0.893<br>/0.568               | 0.090/0.720<br>/0.405               |
| Quilting [2]                                                 | 0.683/ <b>1.000</b><br>/0.842       | 0.363/ <b>0.983</b><br>/0.673       | 0.151/ <b>0.981</b><br>/0.566       | 307/ <b>0.981</b><br>/0.644         | 0.147/ <b>0.967</b><br>/0.557       |
| Pixel Deflection [4]                                         | 0.870/ <b>1.000</b><br>/0.935       | 0.247/0.903<br>/0.575               | 0.067/0.953<br>/0.510               | 0.017/0.523<br>/0.270               | 0.027/0.817<br>/0.422               |
| ComDefend [3]                                                | 0.820/ <b>1.000</b><br>/0.910       | 0.263/0.937<br>/0.600               | 0.087/0.937<br>/0.512               | 0.060/0.743<br>/0.402               | 0.029/0.8401<br>/0.435              |
| A-VAE                                                        | 0.830/0.997<br>/0.913               | <b>0.562/0.980</b><br><b>/0.771</b> | <b>0.343/0.963</b><br><b>/0.653</b> | <b>0.453/0.960</b><br><b>/0.707</b> | <b>0.367/0.943</b><br><b>/0.655</b> |

**Table 4.** Hyperparameters selection.

| LFW (Same identity pairs/Different identities pairs/Average) |                                   |                          |                            |
|--------------------------------------------------------------|-----------------------------------|--------------------------|----------------------------|
|                                                              | clean                             | FGSM<br>$\epsilon = 8$   | PGD<br>$\epsilon = 8$      |
| $\tau = 0.01$                                                | 0.906/0.997/0.952                 | 0.619/0.830/0.725        | 0.682/0.941/0.812          |
| $\tau = 0.02$                                                | 0.913/0.997/0.955                 | 0.630/0.861/0.746        | 0.679/ <b>0.960</b> /0.820 |
| $\tau = 0.03$                                                | 0.927/ <b>1.000</b> /0.963        | <b>0.637/0.863/0.753</b> | <b>0.697/0.960/0.828</b>   |
| $\tau = 0.06$                                                | <b>0.937</b> /0.998/ <b>0.968</b> | 0.623/0.851/0.737        | 0.680/0.955/0.818          |

## C Hyperparameters selection

We discuss the hyperparameter  $\tau$  used in inference time that should be determined by experiments. From Table 4, we can find that for clean images, the accuracy increases constantly with the shrink of  $\tau$ . This shows that the constraint on latent code  $z$  inevitably limits the expressiveness of the model. As compensation, when defending against adversarial attacks, it has been shown that projecting images to high probability region enhances robustness of model.

## D Network architectures

Table 5, Table 6, and Table 7 show network architectures of the encoder, decoder, and discriminator that we use.  $\text{Conv}(c, k \times k, s)$  refers to a convolutional layer with  $c$  feature maps, filter size  $k \times k$ , and stride  $s$ . LReLU refers leaky ReLU with leakiness 0.2. The skip connection concatenates activations from layer 1 in the encoder to layer 4 in the decoder. The upsampling and downsampling operations correspond to  $2 \times 2$  element replication and average pooling, respectively.

**Table 5.** Neural network architecture of the encoder.

| Encoder                                                                |                           |
|------------------------------------------------------------------------|---------------------------|
| Type                                                                   | Output shape              |
| $\text{Conv}(256, 3 \times 3, 1) + \text{InstanceNorm} + \text{LReLU}$ | $256 \times 32 \times 32$ |
| $\text{Conv}(256, 3 \times 3, 2) + \text{InstanceNorm} + \text{LReLU}$ | $256 \times 16 \times 16$ |
| $\text{Conv}(512, 3 \times 3, 1) + \text{InstanceNorm} + \text{LReLU}$ | $512 \times 16 \times 16$ |
| $\text{Conv}(512, 3 \times 3, 2) + \text{InstanceNorm} + \text{LReLU}$ | $512 \times 8 \times 8$   |
| $\text{Conv}(1024, 3 \times 3, 1) + \text{LReLU}$                      | $1024 \times 8 \times 8$  |
| $\text{Conv}(1024, 3 \times 3, 2) + \text{LReLU}$                      | $1024 \times 4 \times 4$  |

## E Additional quantitative results on ArcFace

We report results on ArcFace under grey-box and white-box attacks in Table 8 and Table 9.

## F Additional qualitative examples

In Figure 2 and Figure 3, we show more stochastic generated results on LFW.

**Table 6.** Nerual network architecture of the decoder.

| Decoder                                       |                             |
|-----------------------------------------------|-----------------------------|
| Type                                          | Output shape                |
| Const $512 \times 4 \times 4$ + LReLU + AdaIN | $512 \times 4 \times 4$     |
| Conv(512, $3 \times 3$ , 1) + LReLU + AdaIN   | $512 \times 4 \times 4$     |
| Upsample                                      | $512 \times 8 \times 8$     |
| Conv(512, $3 \times 3$ , 1) + LReLU + AdaIN   | $512 \times 8 \times 8$     |
| Conv(512, $3 \times 3$ , 1) + LReLU + AdaIN   | $512 \times 8 \times 8$     |
| Upsample                                      | $512 \times 16 \times 16$   |
| Conv(512, $3 \times 3$ , 1) + LReLU + AdaIN   | $512 \times 16 \times 16$   |
| Conv(512, $3 \times 3$ , 1) + LReLU + AdaIN   | $512 \times 16 \times 16$   |
| Upsample                                      | $768 \times 32 \times 32$   |
| Conv(256, $3 \times 3$ , 1) + LReLU + AdaIN   | $256 \times 32 \times 32$   |
| Conv(256, $3 \times 3$ , 1) + LReLU + AdaIN   | $256 \times 32 \times 32$   |
| Upsample                                      | $256 \times 64 \times 64$   |
| Conv(256, $3 \times 3$ , 1) + LReLU + AdaIN   | $256 \times 64 \times 64$   |
| Conv(256, $3 \times 3$ , 1) + LReLU + AdaIN   | $256 \times 64 \times 64$   |
| Upsample                                      | $256 \times 128 \times 128$ |
| Conv(256, $3 \times 3$ , 1) + LReLU + AdaIN   | $128 \times 128 \times 128$ |
| Conv(256, $3 \times 3$ , 1) + LReLU + AdaIN   | $128 \times 128 \times 128$ |
| Conv(256, $1 \times 1$ , 1)                   | $3 \times 128 \times 128$   |

## References

1. Goodfellow, I.J., Shlens, J., Szegedy, C.: Explaining and harnessing adversarial examples. arXiv preprint arXiv:1412.6572 (2014)
2. Guo, C., Rana, M., Cissé, M., van der Maaten, L.: Countering adversarial images using input transformations. In: 6th International Conference on Learning Representations, ICLR 2018, Vancouver, BC, Canada, April 30 - May 3, 2018, Conference Track Proceedings. OpenReview.net (2018)
3. Jia, X., Wei, X., Cao, X., Foroosh, H.: Comdefend: An efficient image compression model to defend adversarial examples. In: IEEE Conference on Computer Vision and Pattern Recognition, CVPR 2019, Long Beach, CA, USA, June 16-20, 2019. pp. 6084–6092. Computer Vision Foundation / IEEE (2019)
4. Prakash, A., Moran, N., Garber, S., DiLillo, A., Storer, J.: Deflecting adversarial attacks with pixel deflection. In: Proceedings of the IEEE conference on computer vision and pattern recognition. pp. 8571–8580 (2018)
5. Xie, C., Wu, Y., Maaten, L.v.d., Yuille, A.L., He, K.: Feature denoising for improving adversarial robustness. In: Proceedings of the IEEE Conference on Computer Vision and Pattern Recognition. pp. 501–509 (2019)

**Table 7.** Neural network architecture of the discriminator.

| Discriminator                              |                 |
|--------------------------------------------|-----------------|
| Type                                       | Output shape    |
| Conv(64, 1 × 1, 1)                         | 64 × 128 × 128  |
| Conv(128, 3 × 3, 1) + InstanceNorm + LReLU | 128 × 128 × 128 |
| Conv(256, 3 × 3, 1) + InstanceNorm + LReLU | 128 × 128 × 128 |
| Downsample                                 | 128 × 64 × 64   |
| Conv(256, 3 × 3, 1) + InstanceNorm + LReLU | 256 × 64 × 64   |
| Conv(256, 3 × 3, 1) + InstanceNorm + LReLU | 256 × 64 × 64   |
| Downsample                                 | 256 × 32 × 32   |
| Conv(512, 3 × 3, 1) + InstanceNorm + LReLU | 512 × 32 × 32   |
| Conv(512, 3 × 3, 1) + InstanceNorm + LReLU | 512 × 32 × 32   |
| Downsample                                 | 512 × 16 × 16   |
| Conv(512, 3 × 3, 1) + InstanceNorm + LReLU | 512 × 16 × 16   |
| Conv(512, 3 × 3, 1) + InstanceNorm + LReLU | 512 × 16 × 16   |
| Downsample                                 | 512 × 8 × 8     |
| Conv(512, 3 × 3, 1) + InstanceNorm + LReLU | 512 × 8 × 8     |
| Conv(512, 3 × 3, 1) + InstanceNorm + LReLU | 512 × 8 × 8     |
| Downsample                                 | 512 × 4 × 4     |
| Conv(512, 3 × 3, 1) + LReLU                | 512 × 4 × 4     |
| Conv(512, 4 × 4, 1) + LReLU                | 512 × 1 × 1     |
| Fully-connected                            | 1 × 1 × 1       |

**Table 8.** Verification accuracies of different defense methods on the LFW dataset, under FGSM, PGD, C&W grey-box attacks. The target model is ArcFace.

| LFW (Same identity pairs/Different identities pairs/Average) |                               |                               |                               |                               |                               |
|--------------------------------------------------------------|-------------------------------|-------------------------------|-------------------------------|-------------------------------|-------------------------------|
| Defense                                                      | clean                         | FGSM<br>$\epsilon = 4$        | FGSM<br>$\epsilon = 8$        | PGD<br>$\epsilon = 8$         | C&W                           |
| No Defense                                                   | 0.994/0.994<br>/0.994         | 0.542/0.437<br>/0.489         | 0.247/0.382<br>/0.315         | 0.000/0.020<br>/0.010         | 0.000/0.031<br>/0.015         |
| Adversarial Training [1]                                     | 0.980/0.990<br>/0.985         | 0.552/0.829<br>/0.691         | 0.217/0.780<br>/0.499         | 0.031/0.180<br>/0.106         | 0.000/0.502<br>/0.251         |
| Feature Denoising [5]                                        | 0.957/0.963<br>/0.960         | 0.682/0.731<br>/0.706         | 0.203/0.740<br>/0.472         | 0.099/0.301<br>/0.201         | 0.037/0.550<br>/0.294         |
| TVM [2]                                                      | <b>0.992</b> /0.991<br>/0.992 | 0.761/0.732<br>/0.747         | 0.371/0.400<br>/0.385         | 0.287/0.381<br>/0.334         | 0.007/0.050<br>/0.029         |
| Quilting [2]                                                 | 0.984/0.994<br>/0.989         | 0.819/0.903<br>/0.861         | 0.641/0.670<br>/0.655         | 0.690/0.796<br>/0.743         | 0.157/0.051<br>/0.104         |
| ComDefend [3]                                                | 0.987/0.991<br>/0.989         | 0.502/0.691<br>/0.597         | 0.334/0.417<br>/0.376         | 0.051/0.130<br>/0.091         | 0.000/0.021<br>/0.011         |
| A-VAE                                                        | 0.941/ <b>0.999</b><br>/0.970 | <b>0.847</b> /0.963<br>/0.905 | <b>0.669</b> /0.877<br>/0.773 | <b>0.714</b> /0.975<br>/0.845 | <b>0.451</b> /0.793<br>/0.622 |

**Table 9.** Verification accuracies of different defense methods on the LFW dataset, under FGSM, PGD, C&W white-box attacks. The target model is ArcFace.

| LFW (Same identity pairs/Different identities pairs/Average) |                            |                           |                           |                           |
|--------------------------------------------------------------|----------------------------|---------------------------|---------------------------|---------------------------|
| Defense                                                      | clean                      | FGSM<br>$\epsilon = 4$    | FGSM<br>$\epsilon = 8$    | PGD<br>$\epsilon = 8$     |
| No Defense                                                   | 0.994/0.994/0.994          | 0.542/0.437/0.489         | 0.247/0.382/0.315         | 0.000/0.020/0.010         |
| Adversarial Training [1]                                     | 0.980/0.990/0.985          | 0.407/0.743/0.575         | 0.208/0.651/0.430         | 0.000/0.008/0.004         |
| Feature Denoising [5]                                        | 0.957/0.963/0.960          | 0.439/0.500/0.469         | 0.230/0.452/0.341         | 0.000/0.037/0.019         |
| ComDefend [3]                                                | <b>0.987</b> /0.991/0.989  | 0.501/0.624/0.563         | 0.281/0.536/0.409         | 0.189/0.331/0.260         |
| A-VAE                                                        | 0.941/ <b>0.999</b> /0.970 | <b>0.758</b> /0.763/0.761 | <b>0.448</b> /0.662/0.555 | <b>0.603</b> /0.639/0.621 |

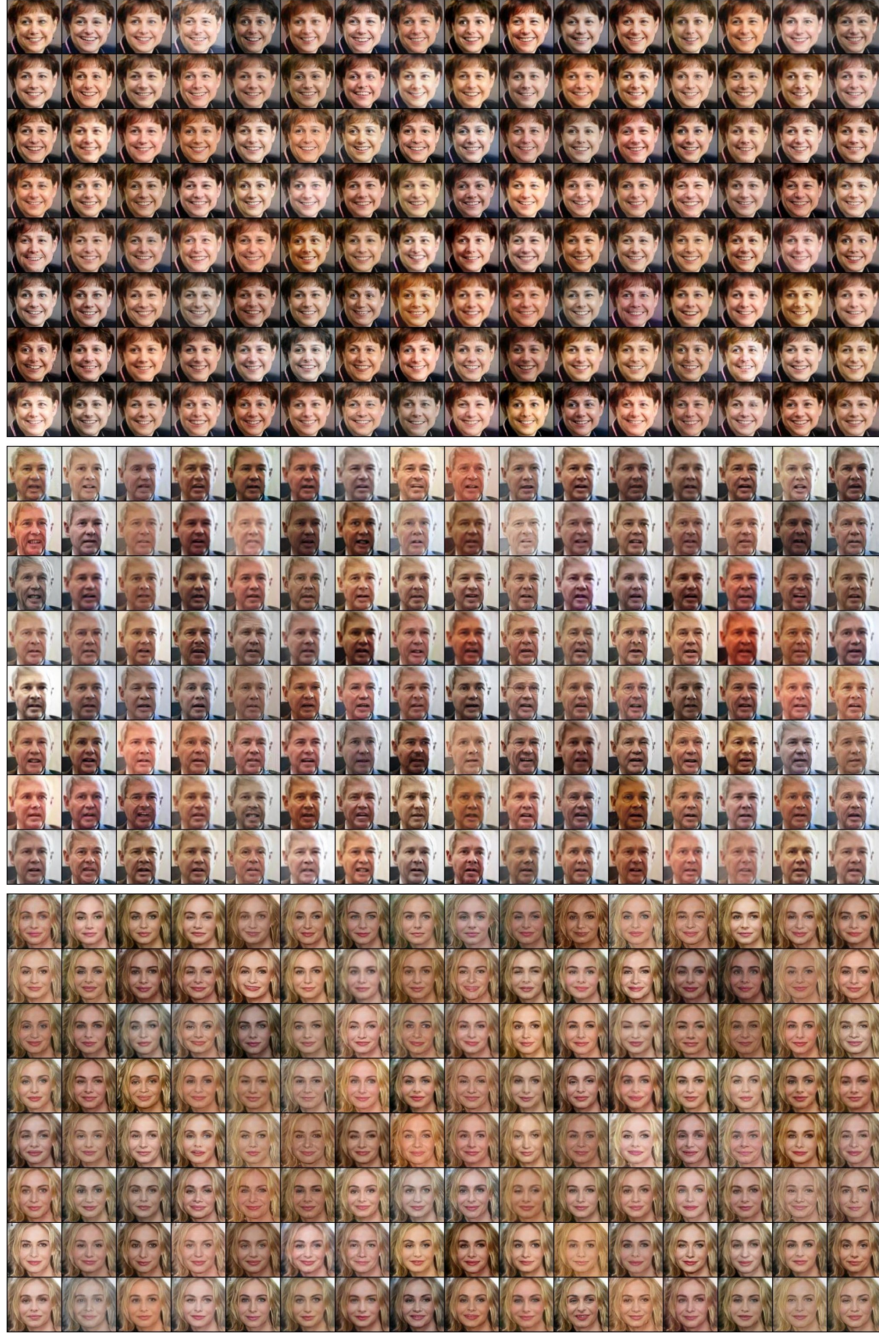

**Fig. 2.** Stochastic generated results on LFW. The input image is in the upper left corner, and the rest are the realizations of latent code.



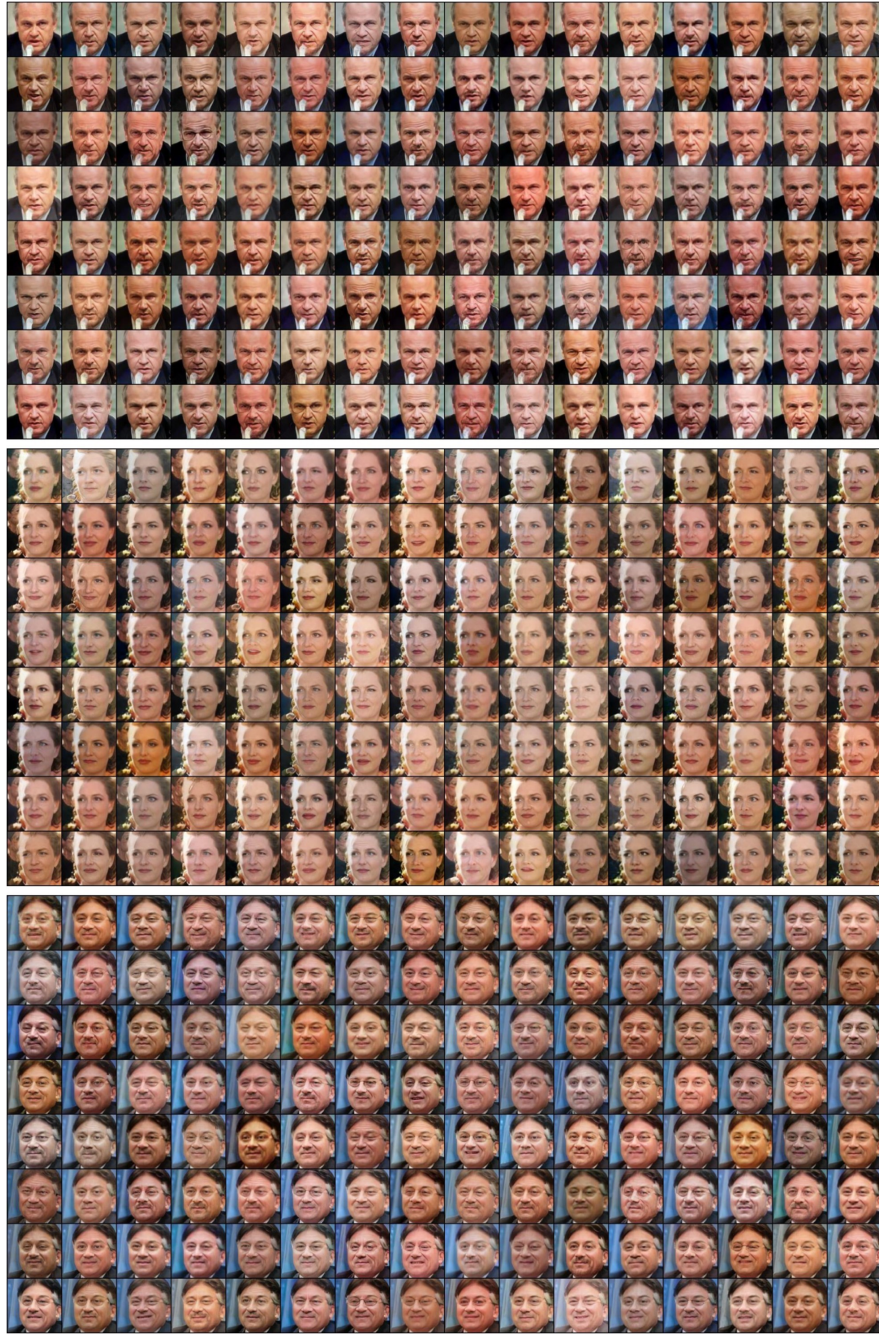

**Fig. 3.** Stochastic generated results on LFW. The input image is in the upper left corner, and the rest are the realizations of latent code.
